# Supplementary material
Source: MDPI journal article supplement (https://www.mdpi.com/2311-5637/8/12/704)
Supplement: s1 [file s1 › fermentation-2052909-supplementary.pdf]

Supplementary material

==== Shimadzu LabSolutions Calibration Curve ====

ID# : 1  
Name : Cellobiose  
Quantitative Method : External Standard  
Function :  $f(x)=268565 \cdot x-21427.1$   
Rr1=0.9995679 Rr2=0.9991360 RSS=9.111441e+008  
MeanRF: 2.519031e+005 RfSD: 1.320872e+004 RFRSD: 5.243573  
FitType : Linear  
ZeroThrough : Not Through  
Weighted Regression : None  
Detector Name : Detector A

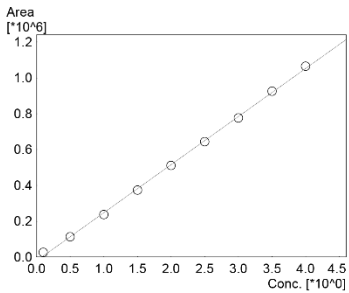

| # | Conc.(Ratio) | MeanArea | Area   |
|---|--------------|----------|--------|
| 1 | 0.1          | 25489    | 24967  |
|   |              |          | 25823  |
|   |              |          | 25675  |
| 2 | 0.5          | 112329   | 112265 |
|   |              |          | 111229 |
|   |              |          | 113491 |
| 3 | 1            | 236764   | 232132 |
|   |              |          | 238099 |
|   |              |          | 240062 |
| 4 | 1.5          | 373406   | 383581 |
|   |              |          | 367051 |
|   |              |          | 369587 |
| 5 | 2            | 510326   | 514103 |
|   |              |          | 502929 |
|   |              |          | 513947 |
| 6 | 2.5          | 643751   | 643159 |
|   |              |          | 652680 |
|   |              |          | 635416 |
| 7 | 3            | 775679   | 773794 |
|   |              |          | 771235 |
|   |              |          | 782007 |

ID# : 2  
Name : Glucose  
Quantitative Method : External Standard  
Function :  $f(x)=257802 \cdot x-15920.0$   
Rr1=0.9995992 Rr2=0.9991986 RSS=7.787030e+008  
MeanRF: 2.409830e+005 RfSD: 1.679015e+004 RFRSD: 6.967357  
FitType : Linear  
ZeroThrough : Not Through  
Weighted Regression : None  
Detector Name : Detector A

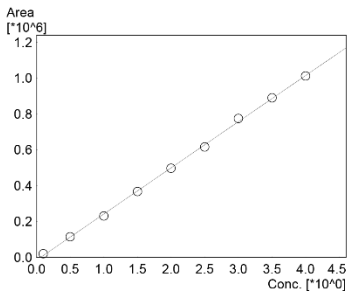

| # | Conc.(Ratio) | MeanArea | Area   |
|---|--------------|----------|--------|
| 1 | 0.1          | 20298    | 20165  |
|   |              |          | 20584  |
|   |              |          | 20143  |
| 2 | 0.5          | 115031   | 115194 |
|   |              |          | 114777 |
|   |              |          | 115122 |
| 3 | 1            | 230378   | 230763 |
|   |              |          | 229399 |
|   |              |          | 230973 |
| 4 | 1.5          | 367622   | 367206 |
|   |              |          | 369811 |
|   |              |          | 365850 |
| 5 | 2            | 496745   | 498390 |
|   |              |          | 498027 |
|   |              |          | 493817 |
| 6 | 2.5          | 615692   | 609752 |
|   |              |          | 612242 |
|   |              |          | 625082 |
| 7 | 3            | 775478   | 784035 |
|   |              |          | 781486 |
|   |              |          | 760901 |

Figure S1 Carbohydrate calibration-1

ID# : 3  
 Name : Xylose  
 Quantitative Method : External Standard  
 Function :  $f(x) = 298393x - 17868.2$   
 $R^2 = 0.9999107$   $R^2 = 0.9998214$   $RSS = 2.323244e+008$   
 MeanRF: 2.764211e+005 RFSD: 2.683019e+004 RFRSD: 9.706274  
 FitType : Linear  
 ZeroThrough : Not Through  
 Weighted Regression : None  
 Detector Name : Detector A

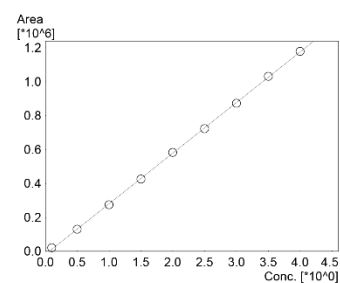

| # | Conc.(Ratio) | MeanArea | Area   |
|---|--------------|----------|--------|
| 1 | 0.1          | 20853    | 20418  |
|   |              |          | 21296  |
|   |              |          | 20844  |
| 2 | 0.5          | 129894   | 128947 |
|   |              |          | 129652 |
|   |              |          | 131084 |
| 3 | 1            | 274586   | 272839 |
|   |              |          | 275269 |
|   |              |          | 275550 |
| 4 | 1.5          | 426150   | 429225 |
|   |              |          | 424521 |
|   |              |          | 424702 |
| 5 | 2            | 582703   | 582481 |
|   |              |          | 579573 |
|   |              |          | 586056 |
| 6 | 2.5          | 722941   | 721579 |
|   |              |          | 727010 |
|   |              |          | 720234 |
| 7 | 3            | 872250   | 865934 |
|   |              |          | 870240 |
|   |              |          | 880576 |

ID# : 4  
 Name : Galactose  
 Quantitative Method : External Standard  
 Function :  $f(x) = 300719x - 16257.2$   
 $R^2 = 0.9999283$   $R^2 = 0.9998566$   $RSS = 1.694707e+008$   
 MeanRF: 2.758890e+005 RFSD: 3.913491e+004 RFRSD: 14.185020  
 FitType : Linear  
 ZeroThrough : Not Through  
 Weighted Regression : None  
 Detector Name : Detector A

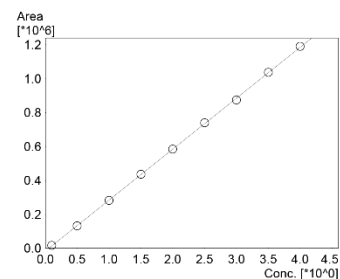

| # | Conc.(Ratio) | MeanArea | Area   |
|---|--------------|----------|--------|
| 1 | 0.1          | 17138    | 16680  |
|   |              |          | 17832  |
|   |              |          | 16800  |
| 2 | 0.5          | 131777   | 130898 |
|   |              |          | 131112 |
|   |              |          | 133322 |
| 3 | 1            | 282468   | 278245 |
|   |              |          | 285902 |
|   |              |          | 283258 |
| 4 | 1.5          | 437070   | 438060 |
|   |              |          | 433120 |
|   |              |          | 440011 |
| 5 | 2            | 584789   | 579981 |
|   |              |          | 580876 |
|   |              |          | 593509 |
| 6 | 2.5          | 740033   | 741123 |
|   |              |          | 748266 |
|   |              |          | 730711 |
| 7 | 3            | 874836   | 863397 |
|   |              |          | 871450 |
|   |              |          | 889660 |

Figure S2 carbohydrate calibration-2

ID# : 5  
 Name : Arabinose  
 Quantitative Method : External Standard  
 Function :  $f(x)=289664 \times x-7828.21$   
 $Rr1=0.9999285$   $Rr2=0.9998570$   $RSS=1.753046e+008$   
 MeanRF: 2.727462e+005 RFSD: 3.304902e+004 RFRSD: 12.117135  
 FitType : Linear  
 ZeroThrough : Not Through  
 Weighted Regression : None  
 Detector Name : Detector A

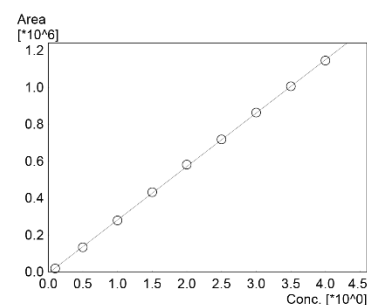

| # | Conc.(Ratio) | MeanArea | Area   |
|---|--------------|----------|--------|
| 1 | 0.1          | 18317    | 17876  |
|   |              |          | 18486  |
|   |              |          | 18589  |
| 2 | 0.5          | 133586   | 130954 |
|   |              |          | 134358 |
|   |              |          | 135446 |
| 3 | 1            | 278592   | 277375 |
|   |              |          | 280694 |
|   |              |          | 277708 |
| 4 | 1.5          | 431334   | 428056 |
|   |              |          | 431655 |
|   |              |          | 434292 |
| 5 | 2            | 580611   | 579225 |
|   |              |          | 579444 |
|   |              |          | 583165 |
| 6 | 2.5          | 717575   | 709562 |
|   |              |          | 722542 |
|   |              |          | 720623 |
| 7 | 3            | 862620   | 867046 |
|   |              |          | 862925 |
|   |              |          | 857890 |

ID# : 6  
 Name : Mannose  
 Quantitative Method : External Standard  
 Function :  $f(x)=340995 \times x-16184.6$   
 $Rr1=0.9998631$   $Rr2=0.9997262$   $RSS=4.651460e+008$   
 MeanRF: 3.143239e+005 RFSD: 4.504760e+004 RFRSD: 14.331585  
 FitType : Linear  
 ZeroThrough : Not Through  
 Weighted Regression : None  
 Detector Name : Detector A

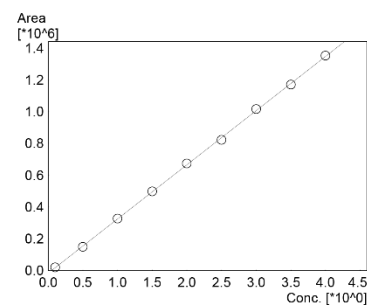

| # | Conc.(Ratio) | MeanArea | Area    |
|---|--------------|----------|---------|
| 1 | 0.1          | 19527    | 18847   |
|   |              |          | 19898   |
|   |              |          | 19837   |
| 2 | 0.5          | 149340   | 143944  |
|   |              |          | 152033  |
|   |              |          | 152044  |
| 3 | 1            | 326758   | 334922  |
|   |              |          | 333539  |
|   |              |          | 311814  |
| 4 | 1.5          | 497879   | 472794  |
|   |              |          | 509637  |
|   |              |          | 511006  |
| 5 | 2            | 673674   | 657800  |
|   |              |          | 678003  |
|   |              |          | 685219  |
| 6 | 2.5          | 821462   | 798781  |
|   |              |          | 820213  |
|   |              |          | 845393  |
| 7 | 3            | 1015701  | 1029015 |
|   |              |          | 1006319 |
|   |              |          | 1011770 |

Figure S3 carbohydrate calibration – 3

# ==== Shimadzu LabSolutions Calibration Curve ====

ID# : 1  
 Name : Acetic acid  
 Quantitative Method : External Standard  
 Function :  $f(x)=153298 \cdot x - 1156.90$   
 $Rr1=0.9985355$   $Rr2=0.9970732$   $RSS=1.639262e+007$   
 MeanRF: 1.476569e+005 RFSD: 4.805890e+003 RFRSD: 3.254769  
 FitType : Linear  
 ZeroThrough : Not Through  
 Weighted Regression : None  
 Detector Name : Detector A

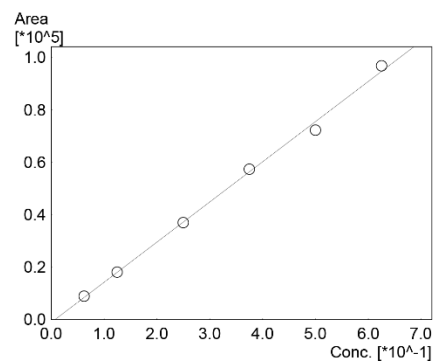

| # | Conc.(Ratio) | MeanArea | Area  |
|---|--------------|----------|-------|
| 1 | 0.0625       | 8886     | 8886  |
|   |              |          | 8886  |
|   |              |          | 8886  |
| 2 | 0.125        | 18006    | 18006 |
|   |              |          | 18006 |
|   |              |          | 18006 |
| 3 | 0.25         | 36924    | 36924 |
|   |              |          | 36924 |
|   |              |          | 36924 |
| 4 | 0.375        | 57296    | 57296 |
|   |              |          | 57296 |
|   |              |          | 57296 |
| 5 | 0.5          | 72209    | 72209 |
|   |              |          | 72209 |
|   |              |          | 72209 |
| 6 | 0.625        | 96753    | 96753 |
|   |              |          | 96753 |
|   |              |          | 96753 |

Figure S4 Acetate calibration

## <Sample Information>

Sample Name : CO2-structural-25ulin1ml-apr21  
 Sample ID : CO2-structural-25ulin1ml-apr21  
 Data Filename : CO2-structural-25ulin1ml-apr21.lcd  
 Method Filename : Cb-Glc-Xyl-Gal-Ara-Man-RezexPb+2-80C-50C-calibration.lcm  
 Batch Filename :  
 Vial # : 1-1  
 Injection Volume : 5 uL  
 Date Acquired : 4/15/2021 9:20:26 PM  
 Date Processed : 5/27/2021 10:26:04 AM  
 Sample Type : Unknown  
 Level : 1  
 Acquired by : NIT  
 Processed by : Pradeep

## <Chromatogram>

uRIU

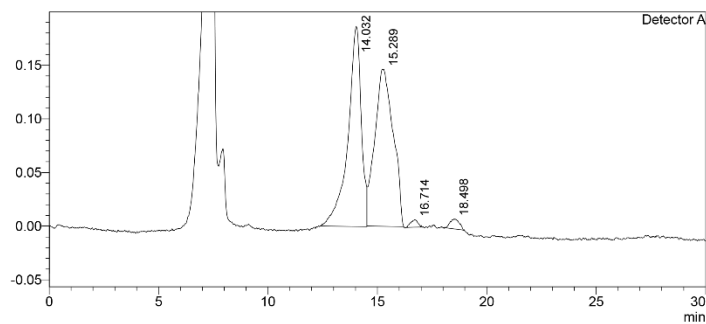

## <Peak Table>

Detector A

| Peak# | Ret. Time | Area  | Height | Conc. | Unit  | Mark | Name      |
|-------|-----------|-------|--------|-------|-------|------|-----------|
| 1     | 14.032    | 7924  | 187    | 0.092 | mg/ml | M    | Glucose   |
| 2     | 15.289    | 8617  | 147    | 0.089 | mg/ml | M    | Xylose    |
| 3     | 16.714    | 161   | 7      | 0.055 | mg/ml | M    | Galactose |
| 4     | 18.498    | 276   | 9      | 0.028 | mg/ml | M    | Arabinose |
| Total |           | 16978 | 349    |       |       |      |           |

Figure S5 Structural carbohydrates-CO

## <Sample Information>

Sample Name : CP2-structural-25ulin1ml-apr21  
 Sample ID : CP2-structural-25ulin1ml-apr21  
 Data Filename : CP2-structural-25ulin1ml-apr21.lcd  
 Method Filename : Cb-Glc-Xyl-Gal-Ara-Man-RezexPb+2-80C-50C-calibration.lcm  
 Batch Filename :  
 Vial # : 1-1  
 Injection Volume : 5 uL  
 Date Acquired : 4/15/2021 10:33:09 PM  
 Date Processed : 5/27/2021 10:33:41 AM  
 Sample Type : Unknown  
 Level : 1  
 Acquired by : NIT  
 Processed by : Pradeep

## <Chromatogram>

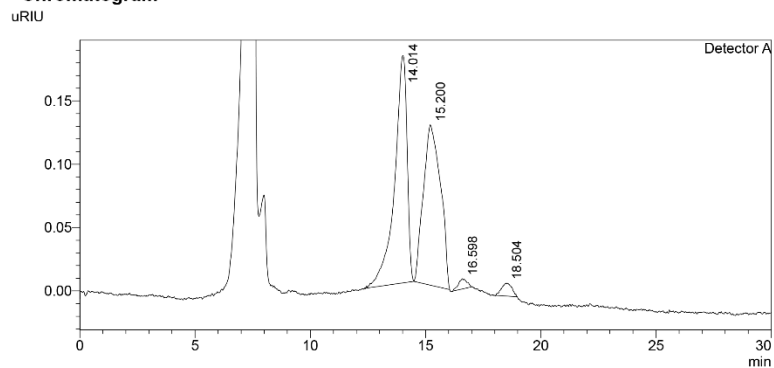

## <Peak Table>

| Detector A |           |       |        |       |       |      |           |
|------------|-----------|-------|--------|-------|-------|------|-----------|
| Peak#      | Ret. Time | Area  | Height | Conc. | Unit  | Mark | Name      |
| 1          | 14.014    | 6746  | 180    | 0.088 | mg/ml | M    | Glucose   |
| 2          | 15.200    | 6530  | 127    | 0.082 | mg/ml | M    | Xylose    |
| 3          | 16.598    | 208   | 8      | 0.055 | mg/ml | M    | Galactose |
| 4          | 18.504    | 321   | 10     | 0.028 | mg/ml | M    | Arabinose |
| Total      |           | 13805 | 325    |       |       |      |           |

Figure S6 Structural carbohydrates – CP

## <Sample Information>

Sample Name : Avicel1-structural-25ulin1ml-apr21  
 Sample ID : Avicel1-structural-25ulin1ml-ap  
 Data Filename : Avicel1-structural-25ulin1ml-apr21.lcd  
 Method Filename : Cb-Glc-Xyl-Gal-Ara-Man-RezexPb+2-80C-50C-calibration.lcm  
 Batch Filename :  
 Vial # : 1-1  
 Injection Volume : 5 uL  
 Date Acquired : 4/16/2021 12:12:00 AM  
 Date Processed : 5/27/2021 10:45:32 AM  
 Sample Type : Unknown  
 Level : 1  
 Acquired by : NIT  
 Processed by : Pradeep

## <Chromatogram>

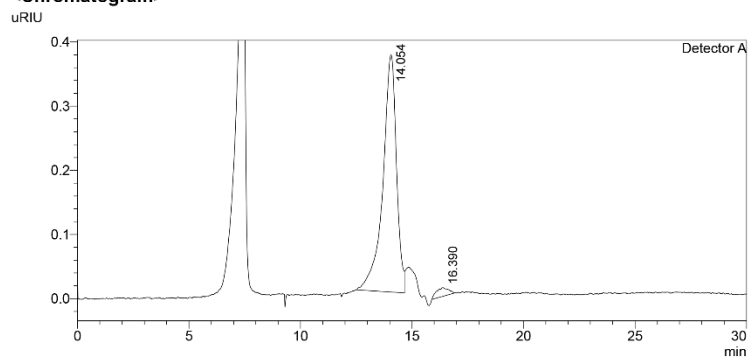

## <Peak Table>

| Peak# | Ret. Time | Area  | Height | Conc. | Unit  | Mark | Name      |
|-------|-----------|-------|--------|-------|-------|------|-----------|
| 1     | 14.054    | 15679 | 370    | 0.123 | mg/ml | M    | Glucose   |
| 2     | 16.390    | 516   | 14     | 0.056 | mg/ml | M    | Galactose |
| Total |           | 16195 | 383    |       |       |      |           |

Figure S7 Structural carbohydrates -AC

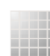

SHIMADZU

LabSolutions

# Analysis Report

## <Sample Information>

Sample Name : Cellulose1-structural-25ulin1ml-apr21  
Sample ID : Cellulose1-structural-25ulin1ml  
Data Filename : Cellulose1-structural-25ulin1ml-apr21.lcd  
Method Filename : Cb-Glc-Xyl-Gal-Ara-Man-RezexPb+2-80C-50C-calibration.lcm  
Batch Filename :  
Vial # : 1-1  
Injection Volume : 5 uL  
Date Acquired : 4/15/2021 11:06:30 PM  
Date Processed : 5/27/2021 10:47:50 AM  
Sample Type : Unknown  
Level : 1  
Acquired by : NIT  
Processed by : Pradeep

## <Chromatogram>

uRIU

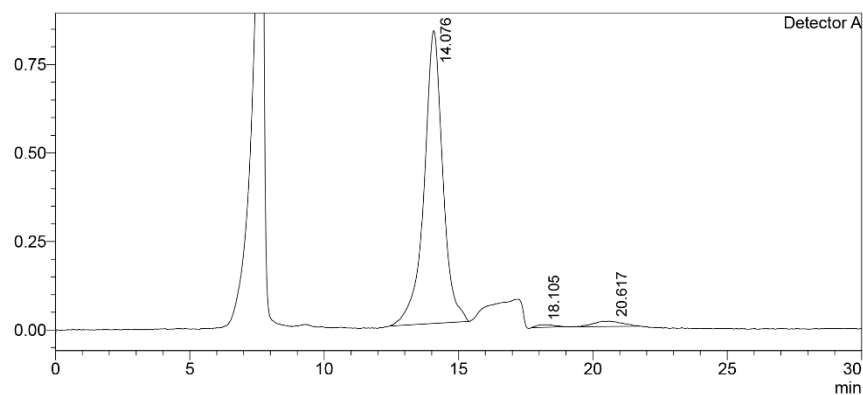

## <Peak Table>

Detector A

| Peak# | Ret. Time | Area  | Height | Conc. | Unit  | Mark | Name      |
|-------|-----------|-------|--------|-------|-------|------|-----------|
| 1     | 14.076    | 40126 | 828    | 0.217 | mg/ml | M    | Glucose   |
| 2     | 18.105    | 330   | 8      | 0.028 | mg/ml | M    | Arabinose |
| 3     | 20.617    | 1089  | 15     | 0.051 | mg/ml | M    | Mannose   |
| Total |           | 41545 | 850    |       |       |      |           |

Figure S8 Structural carbohydrates – CL

## <Sample Information>

Sample Name : CO-no dilution  
 Sample ID : CO-no dilution  
 Data Filename : CO-no dilution.lcd  
 Method Filename : Acetate calibration curve.lcm  
 Batch Filename :  
 Vial # : 1-1  
 Injection Volume : 5 uL  
 Date Acquired : 5/27/2021 7:29:05 PM  
 Date Processed : 7/28/2021 1:00:13 PM  
 Sample Type : Unknown  
 Level : 1  
 Acquired by : NIT  
 Processed by : Pradeep

## <Chromatogram>

uRIU

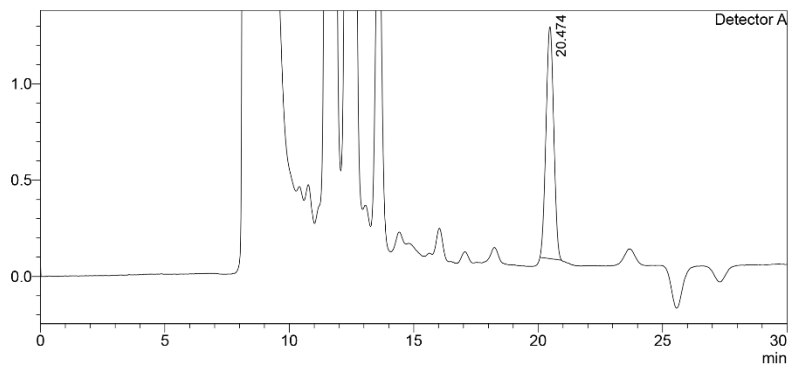

## <Peak Table>

| Detector A |           |       |        |       |       |      |             |
|------------|-----------|-------|--------|-------|-------|------|-------------|
| Peak#      | Ret. Time | Area  | Height | Conc. | Unit  | Mark | Name        |
| 1          | 20.474    | 25600 | 1205   | 0.184 | mg/ml |      | Acetic acid |
| Total      |           | 25600 | 1205   |       |       |      |             |

Figure S9 Acetate -CO

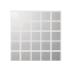

SHIMADZU  
LabSolutions

# Analysis Report

## <Sample Information>

Sample Name : CP-no dilution  
Sample ID : CP-no dilution  
Data Filename : CP-no dilution.lcd  
Method Filename : Acetate calibration curve.lcm  
Batch Filename :  
Vial # : 1-1  
Injection Volume : 5 uL  
Date Acquired : 5/27/2021 6:52:38 PM  
Date Processed : 7/28/2021 12:58:36 PM  
Sample Type : Unknown  
Level : 1  
Acquired by : NIT  
Processed by : Pradeep

## <Chromatogram>

uRIU

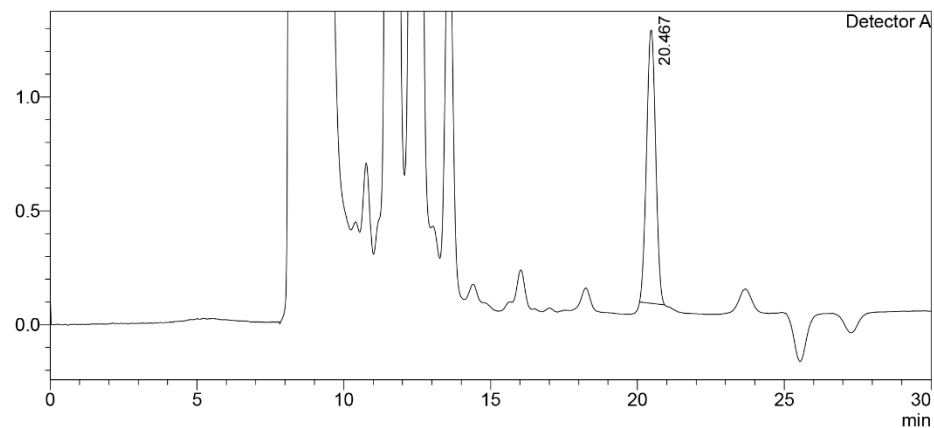

## <Peak Table>

Detector A

| Peak# | Ret. Time | Area  | Height | Conc. | Unit  | Mark | Name        |
|-------|-----------|-------|--------|-------|-------|------|-------------|
| 1     | 20.467    | 25366 | 1200   | 0.182 | mg/ml |      | Acetic acid |
| Total |           | 25366 | 1200   |       |       |      |             |

Figure S10 Acetate – CP

## <Sample Information>

Sample Name : Avicel-no dilution  
 Sample ID : Avicel-no dilution  
 Data Filename : Avicel-no dilution001.lcd  
 Method Filename : organic acids -Repromer H - pradeep.lcm  
 Batch Filename :  
 Vial # : 1-1  
 Injection Volume : 5 uL  
 Date Acquired : 5/27/2021 5:32:27 PM  
 Date Processed : 5/27/2021 6:02:31 PM  
 Sample Type : Unknown  
 Level : 1  
 Acquired by : NIT  
 Processed by : NIT

## <Chromatogram>

uRIU

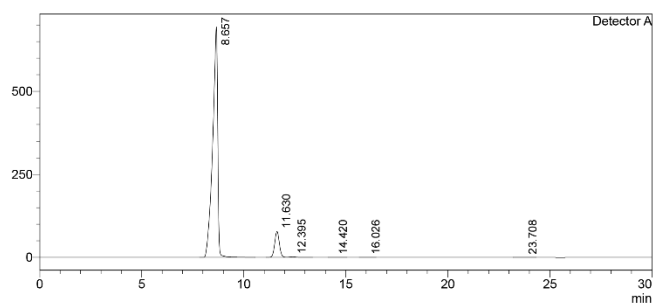

## <Peak Table>

| Peak# | Ret. Time | Area     | Height | Conc.  | Unit  | Mark | Name      |
|-------|-----------|----------|--------|--------|-------|------|-----------|
| 1     | 8.657     | 11959112 | 694055 | 0.000  |       |      |           |
| 2     | 11.630    | 1253413  | 78142  | 0.000  |       |      |           |
| 3     | 12.395    | 43572    | 2005   | -0.000 | mg/ml | V    | RT:12.150 |
| 4     | 14.420    | 2442     | 125    | 0.000  |       |      |           |
| 5     | 16.026    | 5747     | 303    | 0.000  |       |      |           |
| 6     | 23.708    | 7737     | 263    | 0.000  |       |      |           |
| Total |           | 13272024 | 774894 |        |       |      |           |

Figure S11 Acetate – AC

## <Sample Information>

|                  |                                 |              |           |
|------------------|---------------------------------|--------------|-----------|
| Sample Name      | : Cellulose-no dilution         | Sample Type  | : Unknown |
| Sample ID        | : Cellulose-no dilution         | Level        | : 1       |
| Data Filename    | : Cellulose-no dilution.lcd     | Acquired by  | : NIT     |
| Method Filename  | : Acetate calibration curve.lcm | Processed by | : Pradeep |
| Batch Filename   | :                               |              |           |
| Vial #           | : 1-1                           |              |           |
| Injection Volume | : 5 uL                          |              |           |
| Date Acquired    | : 5/27/2021 6:13:52 PM          |              |           |
| Date Processed   | : 7/28/2021 1:01:03 PM          |              |           |

## <Chromatogram>

uRIU

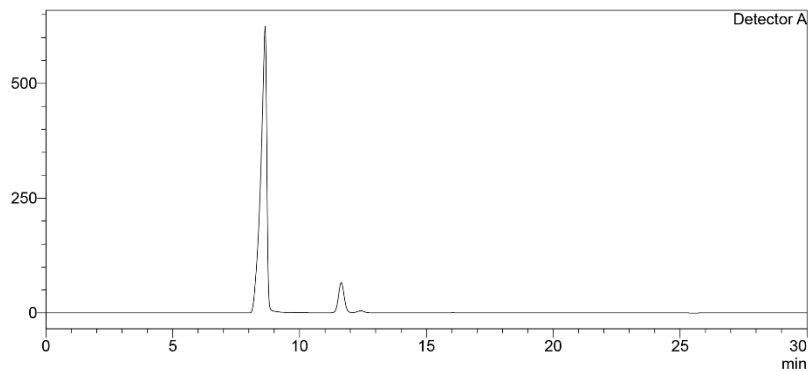

## <Peak Table>

Detector A

| Peak# | Ret. Time | Area | Height | Conc. | Unit | Mark | Name |
|-------|-----------|------|--------|-------|------|------|------|
| Total |           |      |        |       |      |      |      |

Figure S12 Acetate - CL

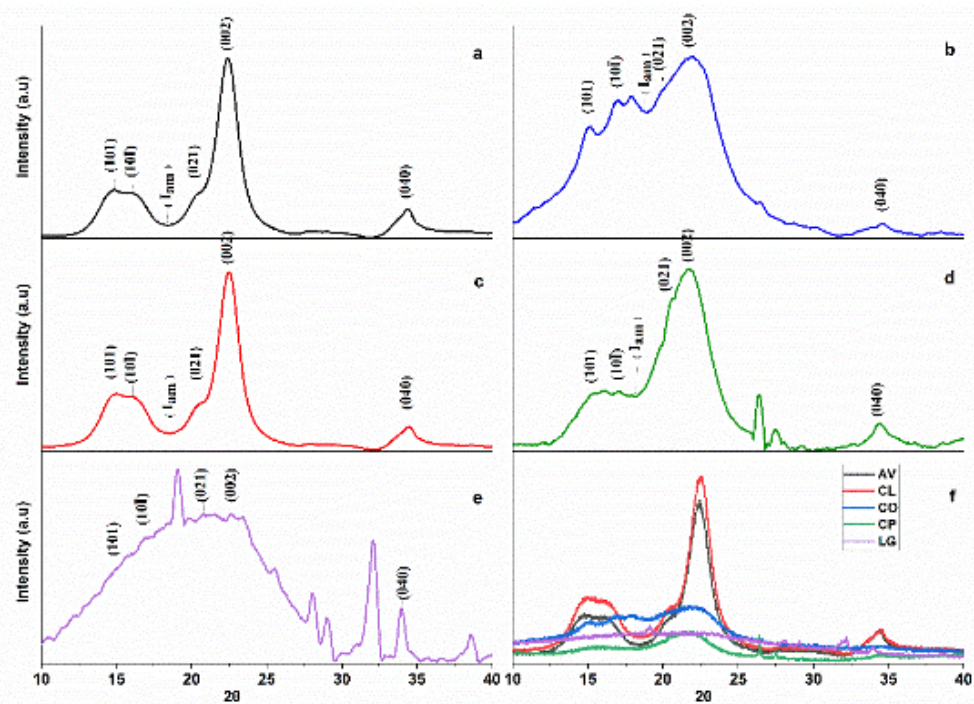

Figure S13 XRD profiles of the samples

Note: a) AC; b) CO; c) CL; d) CP; e) LG; f) all
